# Supplementary material for: Genomic structure and insertion sites of Helicobacter pylori prophages from various geographical origins
Source: PubMed Central journal article supplement (PMC5311958; doi:10.1038/srep42471), 2017-02-16
Supplement: srep42471-s1.pdf [file srep42471-s1.pdf]

**Genomic structure and insertion sites of *Helicobacter pylori* prophages from various geographical origins**

Filipa F. Vale, Alexandra Nunes, Mónica Oleastro, João P. Gomes, Daniel A. Sampaio, Raquel Rocha, Jorge M. B. Vítor, Lars Engstrand, Ben Pascoe, Elvire Berthenet, Sam Sheppard, Matthew D. Hitchings, Francis Mégraud, Jamuna Vadivelu, Philippe Lehours

**Supplementary Information**

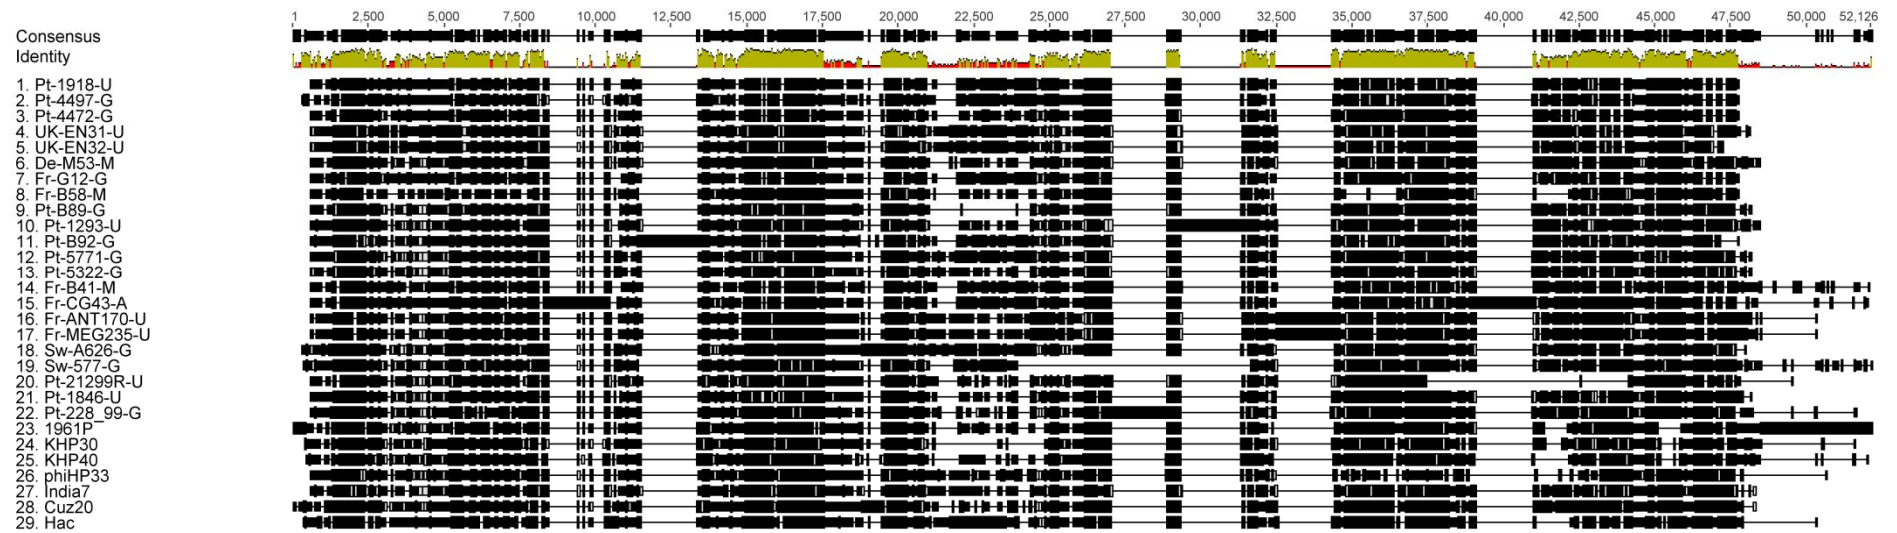

**Figure S1.** MAFFT alignment of prophage genomes showing consensus identity. Consensus identity along the multiple alignment of prophage genomes (bp) shows mean pairwise identity over all pairs in the column. The multiple sequence alignment is a basic tool in inferring the evolutionary history of biological sequences. For instance, the alignment of several homologs can be used to search for patterns of highly conserved regions. The detailed percent similarity between prophage genomes is presented in Figure S2. Green: 100% identity, Greenish-brown: at least 30% and under 100% identity, Red: below 30% identity.

|             | Pt-1918-U | Pt-4497-G | Pt-4472-G | UK-EN31-U | UK-EN32-U | De-M53-M | Fr-G12-G | Fr-B58-M | Pt-B89-G | Pt-1293-U | Pt-B92-G | Pt-5771-G | Pt-5322-G | Fr-B41-M | Fr-CG43-A | Fr-ANT1... | Fr-MEG2... | Sw-A626-G | Sw-577-G | Pt-2129... | Pt-1846-U | Pt-228... | 1961P | KHP30 | KHP40 | phiHP33 | India7 | Cuz20 | Hac   |
|-------------|-----------|-----------|-----------|-----------|-----------|----------|----------|----------|----------|-----------|----------|-----------|-----------|----------|-----------|------------|------------|-----------|----------|------------|-----------|-----------|-------|-------|-------|---------|--------|-------|-------|
| Pt-1918-U   | 91.7%     | 76.0%     | 61.2%     | 61.2%     | 59.5%     | 84.1%    | 48.2%    | 58.4%    | 55.8%    | 64.7%     | 63.0%    | 59.1%     | 90.3%     | 73.3%    | 54.9%     | 54.9%      | 61.1%      | 56.4%     | 51.5%    | 59.4%      | 53.8%     | 56.6%     | 56.8% | 56.1% | 45.7% | 58.9%   | 57.1%  | 53.3% |       |
| Pt-4497-G   | 91.7%     | 72.6%     | 63.7%     | 63.7%     | 61.9%     | 80.7%    | 49.9%    | 60.8%    | 58.0%    | 67.2%     | 65.4%    | 61.5%     | 86.3%     | 74.8%    | 57.0%     | 57.0%      | 63.7%      | 59.0%     | 53.8%    | 61.8%      | 55.9%     | 58.2%     | 58.4% | 58.3% | 48.0% | 61.2%   | 58.9%  | 54.9% |       |
| Pt-4472-G   | 76.0%     | 72.6%     | 63.9%     | 63.9%     | 67.1%     | 75.4%    | 54.4%    | 67.2%    | 62.6%    | 63.4%     | 65.8%    | 66.1%     | 75.2%     | 64.4%    | 61.5%     | 61.5%      | 63.6%      | 58.6%     | 58.0%    | 67.3%      | 62.0%     | 62.7%     | 64.1% | 63.0% | 51.3% | 65.2%   | 63.5%  | 56.4% |       |
| UK-EN31-U   | 61.2%     | 63.7%     | 63.9%     | 100.0%    | 74.9%     | 62.6%    | 56.8%    | 73.1%    | 69.0%    | 67.2%     | 79.8%    | 74.7%     | 60.2%     | 58.7%    | 67.1%     | 67.1%      | 81.5%      | 73.4%     | 57.6%    | 72.3%      | 64.9%     | 63.4%     | 63.7% | 64.8% | 59.8% | 74.6%   | 70.8%  | 63.0% |       |
| UK-EN32-U   | 61.2%     | 63.7%     | 63.9%     | 100.0%    | 74.2%     | 62.6%    | 56.6%    | 72.9%    | 68.8%    | 68.3%     | 79.8%    | 74.5%     | 60.6%     | 58.8%    | 66.9%     | 66.9%      | 81.4%      | 73.2%     | 57.6%    | 72.2%      | 64.7%     | 63.8%     | 64.2% | 65.3% | 59.4% | 74.4%   | 70.6%  | 62.9% |       |
| De-M53-M    | 59.5%     | 61.9%     | 67.1%     | 74.9%     | 74.7%     | 60.7%    | 62.3%    | 80.9%    | 76.6%    | 67.0%     | 77.3%    | 81.9%     | 57.7%     | 56.6%    | 71.1%     | 71.1%      | 74.6%      | 71.1%     | 63.5%    | 80.9%      | 71.2%     | 70.5%     | 70.5% | 70.8% | 63.3% | 82.7%   | 76.1%  | 61.9% |       |
| Fr-G12-G    | 84.1%     | 80.7%     | 75.4%     | 62.6%     | 62.6%     | 60.7%    | 48.8%    | 48.8%    | 60.0%    | 57.0%     | 64.7%    | 64.1%     | 60.4%     | 83.0%    | 72.5%     | 56.4%      | 56.4%      | 62.3%     | 57.5%    | 51.1%      | 60.6%     | 55.6%     | 57.5% | 57.6% | 56.6% | 46.8%   | 60.0%  | 58.2% | 54.1% |
| Fr-B58-M    | 48.2%     | 49.9%     | 54.4%     | 56.8%     | 56.6%     | 62.3%    | 48.8%    | 59.6%    | 57.7%    | 48.9%     | 57.3%    | 60.8%     | 47.5%     | 46.2%    | 53.0%     | 53.0%      | 55.6%      | 51.9%     | 50.9%    | 59.9%      | 54.5%     | 67.5%     | 64.5% | 67.8% | 53.3% | 62.0%   | 59.0%  | 51.2% |       |
| Pt-B89-G    | 58.4%     | 60.8%     | 67.2%     | 73.1%     | 72.9%     | 80.9%    | 60.0%    | 59.6%    | 80.3%    | 80.3%     | 66.5%    | 80.4%     | 84.0%     | 56.7%    | 54.8%     | 70.8%      | 70.8%      | 72.6%     | 69.1%    | 65.4%      | 80.5%     | 73.3%     | 68.0% | 70.5% | 70.4% | 62.9%   | 78.6%  | 76.0% | 61.1% |
| Pt-1293-U   | 55.8%     | 58.0%     | 62.6%     | 69.0%     | 68.8%     | 76.6%    | 57.0%    | 57.7%    | 80.3%    | 80.3%     | 63.6%    | 76.4%     | 79.9%     | 54.1%    | 52.6%     | 67.9%      | 67.9%      | 68.7%     | 65.6%    | 61.8%      | 77.8%     | 68.9%     | 65.2% | 64.6% | 65.9% | 60.5%   | 75.4%  | 70.6% | 58.1% |
| Pt-B92-G    | 64.7%     | 67.2%     | 63.4%     | 67.2%     | 68.3%     | 67.0%    | 64.7%    | 48.9%    | 66.5%    | 63.6%     | 70.7%    | 66.9%     | 63.3%     | 59.7%    | 61.8%     | 61.8%      | 67.7%      | 61.7%     | 53.5%    | 67.5%      | 61.0%     | 57.2%     | 57.4% | 57.8% | 53.9% | 65.4%   | 62.7%  | 56.1% |       |
| Pt-5771-G   | 63.0%     | 65.4%     | 65.8%     | 79.8%     | 79.8%     | 77.3%    | 64.1%    | 57.3%    | 80.4%    | 76.4%     | 70.7%    | 85.0%     | 61.1%     | 59.5%    | 71.2%     | 71.2%      | 80.1%      | 72.6%     | 60.7%    | 76.6%      | 69.0%     | 65.1%     | 65.4% | 66.6% | 64.4% | 78.9%   | 72.0%  | 64.5% |       |
| Pt-5322-G   | 59.1%     | 61.5%     | 66.1%     | 74.7%     | 74.5%     | 81.9%    | 60.4%    | 60.8%    | 84.0%    | 79.9%     | 66.9%    | 85.0%     | 57.5%     | 55.9%    | 73.0%     | 73.0%      | 75.6%      | 70.4%     | 63.9%    | 81.7%      | 71.8%     | 69.6%     | 68.8% | 69.8% | 65.1% | 83.0%   | 75.4%  | 62.5% |       |
| Fr-B41-M    | 90.3%     | 86.3%     | 75.2%     | 60.2%     | 60.6%     | 57.7%    | 83.0%    | 47.5%    | 56.7%    | 54.1%     | 63.3%    | 61.1%     | 57.5%     | 71.8%    | 53.0%     | 53.0%      | 60.3%      | 54.6%     | 50.0%    | 58.1%      | 51.7%     | 50.8%     | 56.2% | 55.1% | 44.1% | 57.4%   | 55.8%  | 51.7% |       |
| Fr-CG43-A   | 73.3%     | 74.8%     | 64.4%     | 58.7%     | 58.8%     | 56.6%    | 72.5%    | 46.2%    | 54.8%    | 52.6%     | 59.7%    | 59.5%     | 55.9%     | 71.8%    | 52.2%     | 52.2%      | 58.9%      | 53.6%     | 47.7%    | 55.9%      | 50.4%     | 48.1%     | 52.9% | 52.5% | 43.6% | 56.1%   | 54.1%  | 49.8% |       |
| Fr-ANT170-U | 54.9%     | 57.0%     | 61.5%     | 67.1%     | 66.9%     | 71.1%    | 56.4%    | 53.0%    | 70.8%    | 67.9%     | 61.8%    | 71.2%     | 73.0%     | 53.0%    | 52.2%     | 99.9%      | 99.9%      | 67.7%     | 63.1%    | 56.9%      | 72.4%     | 67.2%     | 60.9% | 61.1% | 60.1% | 71.5%   | 67.1%  | 57.4% |       |
| Fr-MEG235-U | 54.9%     | 57.0%     | 61.5%     | 67.1%     | 66.9%     | 71.1%    | 56.4%    | 53.0%    | 70.8%    | 67.9%     | 61.8%    | 71.2%     | 73.0%     | 53.0%    | 52.2%     | 99.9%      | 99.9%      | 67.7%     | 63.1%    | 56.8%      | 72.3%     | 67.3%     | 57.4% | 61.0% | 61.2% | 60.1%   | 71.5%  | 67.0% | 57.3% |
| Sw-A626-G   | 61.1%     | 63.7%     | 63.6%     | 81.5%     | 81.4%     | 74.6%    | 62.3%    | 55.6%    | 72.6%    | 68.7%     | 67.7%    | 80.1%     | 75.6%     | 60.3%    | 58.9%     | 67.7%      | 67.7%      | 78.3%     | 59.6%    | 72.6%      | 65.4%     | 64.1%     | 64.3% | 65.0% | 60.7% | 75.2%   | 74.6%  | 63.2% |       |
| Sw-577-G    | 56.4%     | 59.0%     | 58.6%     | 73.4%     | 73.2%     | 71.1%    | 57.5%    | 51.9%    | 69.1%    | 65.6%     | 61.7%    | 72.6%     | 70.4%     | 54.6%    | 53.6%     | 63.1%      | 63.1%      | 78.3%     | 54.2%    | 69.0%      | 60.5%     | 55.0%     | 61.2% | 60.8% | 53.3% | 69.9%   | 67.6%  | 57.7% |       |
| Pt-21299R-U | 51.5%     | 53.8%     | 58.0%     | 57.6%     | 57.6%     | 63.5%    | 51.1%    | 50.9%    | 65.4%    | 61.8%     | 53.5%    | 60.7%     | 63.9%     | 50.0%    | 47.7%     | 56.9%      | 56.8%      | 59.6%     | 54.2%    | 66.3%      | 59.0%     | 57.1%     | 59.6% | 61.1% | 61.8% | 62.6%   | 63.5%  | 54.4% |       |
| Pt-1846-U   | 59.4%     | 61.8%     | 67.3%     | 72.3%     | 72.2%     | 80.9%    | 60.6%    | 59.9%    | 80.5%    | 77.8%     | 67.5%    | 76.6%     | 81.7%     | 58.1%    | 55.9%     | 72.4%      | 72.3%      | 72.6%     | 69.0%    | 66.3%      | 73.5%     | 68.8%     | 69.1% | 69.5% | 64.5% | 78.3%   | 75.3%  | 62.0% |       |
| Pt-228_99-G | 53.8%     | 55.9%     | 62.0%     | 64.9%     | 64.7%     | 71.2%    | 55.6%    | 54.5%    | 73.3%    | 68.9%     | 61.0%    | 69.0%     | 71.8%     | 51.7%    | 50.4%     | 67.2%      | 67.3%      | 65.4%     | 60.5%    | 59.0%      | 73.5%     | 54.7%     | 54.7% | 61.5% | 61.2% | 57.5%   | 70.0%  | 67.7% | 56.5% |
| 1961P       | 56.6%     | 58.2%     | 62.7%     | 63.4%     | 63.8%     | 70.5%    | 57.5%    | 67.5%    | 68.0%    | 65.2%     | 57.2%    | 65.1%     | 69.6%     | 50.8%    | 48.1%     | 57.4%      | 57.4%      | 64.1%     | 55.0%    | 57.1%      | 68.8%     | 54.7%     | 74.4% | 72.7% | 51.0% | 69.8%   | 67.6%  | 54.2% |       |
| KHP30       | 56.8%     | 58.4%     | 64.1%     | 63.7%     | 64.2%     | 70.5%    | 57.6%    | 64.5%    | 70.5%    | 64.6%     | 57.4%    | 65.4%     | 68.8%     | 56.2%    | 52.9%     | 60.9%      | 61.0%      | 64.3%     | 61.2%    | 59.6%      | 69.1%     | 61.5%     | 74.4% | 81.4% | 55.1% | 69.2%   | 69.1%  | 56.8% |       |
| KHP40       | 56.1%     | 58.3%     | 63.0%     | 64.8%     | 65.3%     | 70.8%    | 56.6%    | 67.8%    | 70.4%    | 65.9%     | 57.8%    | 66.6%     | 69.8%     | 55.1%    | 52.5%     | 61.1%      | 61.2%      | 65.0%     | 60.8%    | 61.1%      | 69.5%     | 61.2%     | 72.7% | 81.4% | 55.9% | 70.6%   | 69.1%  | 58.6% |       |
| phiHP33     | 45.7%     | 48.0%     | 51.3%     | 59.8%     | 59.4%     | 63.3%    | 46.8%    | 53.3%    | 62.9%    | 60.5%     | 53.9%    | 64.4%     | 65.1%     | 44.1%    | 43.6%     | 60.1%      | 60.1%      | 60.7%     | 53.3%    | 61.8%      | 64.5%     | 57.5%     | 51.0% | 55.1% | 55.9% | 63.5%   | 63.5%  | 59.0% | 54.8% |
| India7      | 58.9%     | 61.2%     | 65.2%     | 74.6%     | 74.4%     | 82.7%    | 60.0%    | 62.0%    | 78.6%    | 75.4%     | 65.4%    | 78.9%     | 83.0%     | 57.4%    | 56.1%     | 71.5%      | 71.5%      | 75.2%     | 69.9%    | 62.6%      | 78.3%     | 70.0%     | 69.8% | 69.2% | 70.6% | 63.5%   | 75.8%  | 62.4% |       |
| Cuz20       | 57.1%     | 58.9%     | 63.5%     | 70.8%     | 70.6%     | 76.1%    | 58.2%    | 59.0%    | 76.0%    | 70.6%     | 62.7%    | 72.0%     | 75.4%     | 55.8%    | 54.1%     | 67.1%      | 67.0%      | 74.6%     | 67.6%    | 63.5%      | 75.3%     | 67.7%     | 67.6% | 69.1% | 69.1% | 59.0%   | 75.8%  | 60.0% |       |
| Hac         | 53.3%     | 54.9%     | 56.4%     | 63.0%     | 62.9%     | 61.9%    | 54.1%    | 51.2%    | 61.1%    | 58.1%     | 56.1%    | 64.5%     | 62.5%     | 51.7%    | 49.8%     | 57.4%      | 57.3%      | 63.2%     | 57.7%    | 54.4%      | 62.0%     | 56.5%     | 54.2% | 56.8% | 58.6% | 54.8%   | 62.4%  | 60.0% |       |

**Figure S2.** Heat-map representing the phage similarity matrix between 29 phages genomes based on genome content. The heat-map provides a graphical representation of data where values in a matrix are represented as a grey scale: the darker the grey, the greater the similarity.

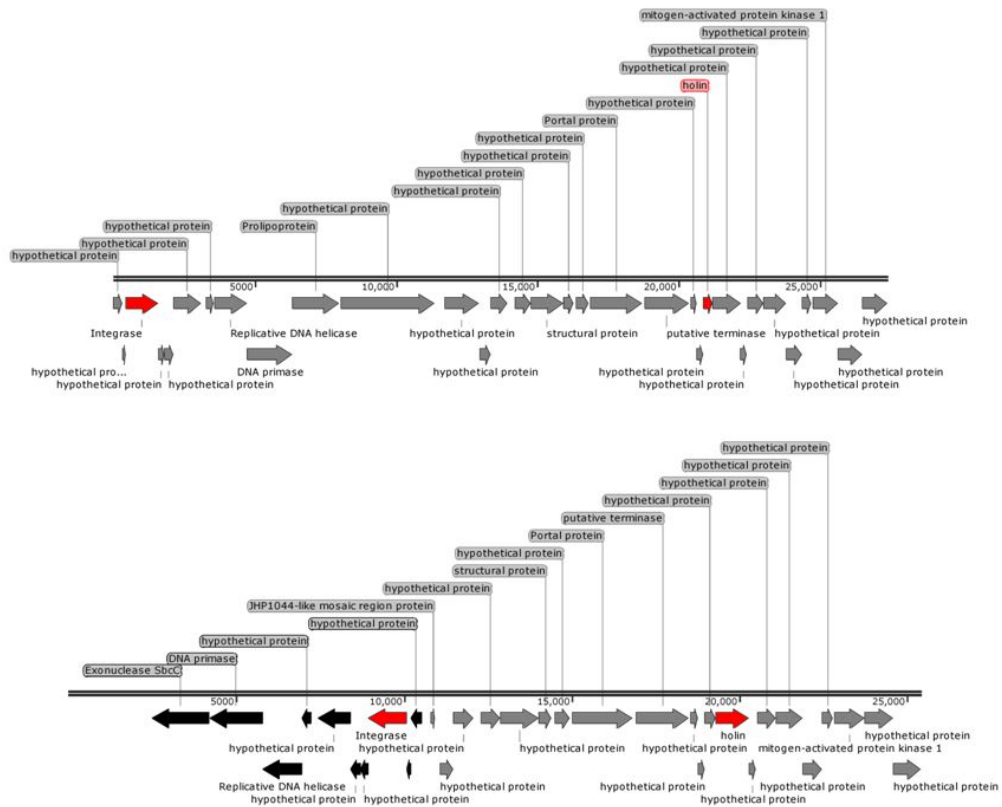

**Figure S3.** Genetic mapping of prophage genomes highlighting the most common positions of genes on top. Prophage open reading frame (ORF) organization for Pt-B89-G (on top) and for Pt-4481-G (on bottom). Red arrows show integrase and holin genes. Black arrows highlight an inversion of the prophage ORF for Pt-B89-G.

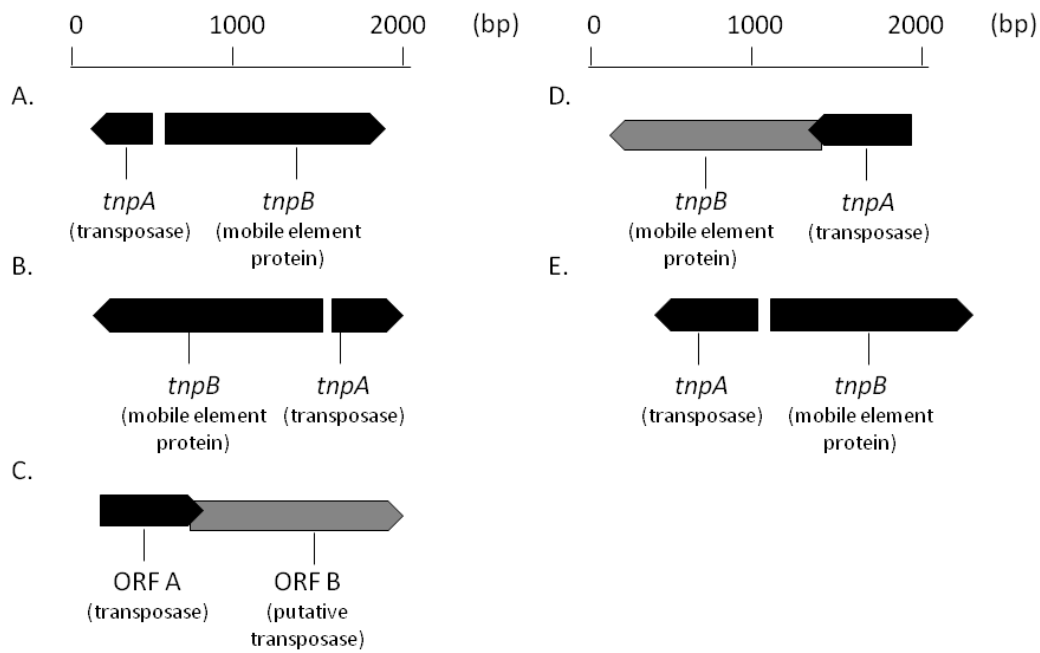

**Figure S4.** Genetic layout of the Insertion Sequences (IS) found in prophage genomes. A. IS605 (representation of accession number U60177) found in Pt-B92-G and in one case of Fr-GC43-A; B. IS605 found in UK-EN31-U, UK-EN32-U and in one case of Fr-GC43-A; C. ISHp608 (representation of accession number AF357224) found twice in Fr-ANT170-G and Fr-MEG235-G (copies in different sense) and once in Pt-228\_99-G and Is-3180-G; D. IS607 (representation of accession number AB889602) found in Pt-1293-U and Fr-B58-M; E. IS606 (representation of accession number U95957) found in Sw-C388-G.

**Table S1. Description of the 28 *H. pylori* strains that harbor prophages.**

| Strain       | Country of isolation | Disease associated     | GC%  | Genome size (Mbp) | Number predicted proteins | Mean depth coverage (per base) | Bioproject accession number |
|--------------|----------------------|------------------------|------|-------------------|---------------------------|--------------------------------|-----------------------------|
| UK-EN31-U    | United Kingdom       | Peptic Ulcer           | 39.0 | 1.61              | 1683                      | 168                            | SRP071274                   |
| UK-EN32-U    | United Kingdom       | Peptic Ulcer           | 38.9 | 1.65              | 1694                      | 163                            | SRP071276                   |
| De-M53-M     | Germany              | MALT lymphoma          | 38.8 | 1.65              | 1695                      | 177                            | SRP064710                   |
| Sw-577-G     | Sweden               | Gastritis              | 38.9 | 1.65              | 1707                      | 188                            | SRP071293                   |
| Sw-A626-G    | Sweden               | Gastritis              | 38.8 | 1.67              | 1709                      | 469                            | SRP071294                   |
| Pt-B89-G     | Portugal             | Gastritis              | 39.0 | 1.62              | 1651                      | 577                            | SRP071278                   |
| Pt-1293-U    | Portugal             | Peptic Ulcer           | 39.0 | 1.63              | 1694                      | 202                            | SRP071280                   |
| Fr-ANT170-U  | France               | Peptic Ulcer           | 39.0 | 1.64              | 1663                      | 20                             | SRP072438                   |
| Fr-MEG235-U  | France               | Peptic Ulcer           | 39.1 | 1.62              | 1644                      | 20                             | SRP072439                   |
| Pt-5771-G    | Portugal             | Gastritis              | 39.0 | 1.67              | 1687                      | 128                            | SRP064707                   |
| Pt-5322-G    | Portugal             | Gastritis              | 39.1 | 1.58              | 1621                      | 235                            | SRP071284                   |
| Pt-228_99-G  | Portugal             | Gastritis              | 39.0 | 1.61              | 1652                      | 39                             | SRP071067                   |
| Pt-1846-U    | Portugal             | Peptic Ulcer           | 39.0 | 1.54              | 1675                      | 52                             | SRP071062                   |
| Pt-B92-G     | Portugal             | Gastritis              | 38.8 | 1.63              | 1670                      | 261                            | SRP071282                   |
| Pt-4481-G    | Portugal             | Gastritis              | 39.0 | 1.59              | 1626                      | 69                             | SRP071279                   |
| Fr-GC43-A    | France               | Gastric adenocarcinoma | 39.0 | 1.61              | 1634                      | 20                             | SRP072440                   |
| Fr-G12-G     | France               | Gastritis              | 38.9 | 1.7               | 1711                      | 831                            | SRP064708                   |
| Fr-B58-M     | France               | MALT lymphoma          | 38.8 | 1.57              | 1630                      | 219                            | SRP071277                   |
| Pt-212-99R-U | Portugal             | Peptic Ulcer           | 38.9 | 1.63              | 1655                      | 225                            | SRP071292                   |
| Pt-1918-U    | Portugal             | Peptic Ulcer           | 39.1 | 1.63              | 1663                      | 212                            | SRP064706                   |
| Pt-4497-U    | Portugal             | Peptic Ulcer           | 39.3 | 1.61              | 1639                      | 242                            | SRP064709                   |
| Pt-4472-G    | Portugal             | Gastritis              | 38.8 | 1.65              | 1680                      | 343                            | SRP071271                   |
| Fr-B41-M     | France               | Gastritis              | 39.1 | 1.69              | 1729                      | 20                             | SRP072441                   |
| Sw-C388-G    | Sweden               | Gastritis              | 38.9 | 1.65              | 1729                      | 145                            | SRP071295                   |
| Sw-C520-G    | Sweden               | Gastritis              | 38.8 | 1.67              | 1698                      | 387                            | SRP071296                   |
| Is-3180-G    | Israel               | Gastritis              | 39.1 | 1.57              | 1588                      | 190                            | SRP071289                   |
| Pt-259-G     | Portugal             | Gastritis              | 39.0 | 1.59              | 1626                      | 137                            | SRP071290                   |
| Pt-5303-G    | Portugal             | Gastritis              | 38.9 | 1.65              | 1672                      | 245                            | SRP071291                   |

**Table S2.** Remnant prophages identified after whole genome sequencing.

| Strain                 | Population  |          | GC%      |          | Insertion Site                                          |                                                                                      | Prophage  |           |          |      | Accession number                             |
|------------------------|-------------|----------|----------|----------|---------------------------------------------------------|--------------------------------------------------------------------------------------|-----------|-----------|----------|------|----------------------------------------------|
|                        | Phage - PST | MLST     | bacteria | prophage | 5'                                                      | 3'                                                                                   | CDS PHAST | CDS PHAGE | CDS RAST | Kb   |                                              |
| Sw-C388-G              | hpNEurope   | hpEurope | 38.9     | 36.1     | S-adenosylmethionine synthetase (EC 2.5.1.6) (jhp_0183) | UDP-3-O-[3-hydroxymyristoyl] glucosamine N-acyltransferase (EC 2.3.1.191) (jhp_0182) | 21        | 21        | 21       | 13.0 | KX119183                                     |
| Sw-C520-G <sup>a</sup> | hpNEurope   | hpEurope | 38.8     | 37.7     | ND                                                      | ND                                                                                   | 14        | 13        | 13       | 13.6 | KX119184<br>KX119185<br>KX119186<br>KX119187 |
| Is-3180-G              | hpAfrica1   | hpEurope | 39.1     | 37.1     | S-adenosylmethionine synthetase (EC 2.5.1.6) (jhp_0183) | UDP-3-O-[3-hydroxymyristoyl] glucosamine N-acyltransferase (EC 2.3.1.191) (jhp_0182) | 28        | 26        | 28       | 19.7 | KX119182                                     |
| Pt-259-G               | hpSWEurope  | hpEurope | 39.0     | 36.2     | hypothetical protein (jhp_0956)                         | hypothetical protein (jhp_0955)                                                      | 12        | 10        | 11       | 11.6 | KX119181                                     |
| Pt-5303-G <sup>b</sup> | hpSWEurope  | hpEurope | 38.9     | 36.2     | Competence protein ComGF (jhp_0650)                     | ND                                                                                   | 20        | 21        | 21       | 19.8 | KX119178<br>KX119179<br>KX119180             |

<sup>a</sup> Prophage in 4 contigs, complete genome sequence not available; <sup>b</sup> Prophage in 3 contigs, complete genome sequence not available. GC: guanine-cytosine; PST: prophage sequence typing; MLST: multilocus sequence typing.

**Table S3. Complete prophages coding sequences.**

| ORF | UK-EN31-U                          | KHP30     | UK-EN32-U                          | KHP30     | De-M53-M                           | KHP30      |
|-----|------------------------------------|-----------|------------------------------------|-----------|------------------------------------|------------|
| 1   | hypothetical protein               | G181_gp01 | hypothetical protein               | G181_gp01 | hypothetical protein               | GP181_gp01 |
| 2   | Integrase                          | G181_gp02 | Integrase                          | G181_gp02 | hypothetical protein               |            |
| 3   | hypothetical protein               | G181_gp03 | hypothetical protein               | G181_gp03 | Integrase                          | G181_gp02  |
| 4   | hypothetical protein               | G181_gp04 | hypothetical protein               | G181_gp04 | hypothetical protein               | G181_gp03  |
| 5   | Mobile element protein (tnpB)      |           | Mobile element protein (tnpB)      |           | hypothetical protein               | G181_gp04  |
| 6   | IS605 transposase (tnpA)           |           | IS605 transposase (tnpA)           |           | hypothetical protein               | G181_gp05  |
| 7   | DNA helicase                       | G181_gp07 | DNA helicase                       | G181_gp07 | hypothetical protein               | G181_gp06  |
| 8   | Replicative DNA helicase           | G181_gp08 | Replicative DNA helicase           | G181_gp08 | Replicative DNA helicase           | G181_gp08  |
| 9   | DNA primase                        | G181_gp09 | DNA primase                        | G181_gp09 | DNA primase                        | G181_gp09  |
| 10  | hypothetical protein               | G181_gp10 | hypothetical protein               | G181_gp10 | Chromosome partition protein smc   | G181_gp10  |
| 11  | hypothetical protein               | G181_gp10 | hypothetical protein               | G181_gp10 | hypothetical protein               | G181_gp11  |
| 12  | hypothetical protein               | G181_gp11 | hypothetical protein               | G181_gp11 | hypothetical protein               |            |
| 13  | tail fiber protein                 |           | tail fiber protein                 |           | hypothetical protein               | G181_gp12  |
| 14  | putative tail fiber                |           | hypothetical protein               |           | hypothetical protein               |            |
| 15  | putative tail assembly protein     |           | hypothetical protein               |           | hypothetical protein               | G181_gp13  |
| 16  | hypothetical protein               |           | hypothetical protein               |           | structural protein                 | G181_gp14  |
| 17  | hypothetical protein               | G181_gp12 | hypothetical protein               | G181_gp12 | hypothetical protein               | G181_gp15  |
| 18  | hypothetical protein               | G181_gp13 | hypothetical protein               | G181_gp13 | hypothetical protein               | G181_gp16  |
| 19  | structural protein                 | G181_gp14 | structural protein                 | G181_gp14 | Portal protein                     | G181_gp17  |
| 20  | hypothetical protein               | G181_gp15 | hypothetical protein               | G181_gp15 | putative terminase                 | G181_gp18  |
| 21  | hypothetical protein               | G181_gp16 | hypothetical protein               | G181_gp16 | hypothetical protein               | G181_gp19  |
| 22  | Portal protein                     | G181_gp17 | Portal protein                     | G181_gp17 | hypothetical protein               | G181_gp20  |
| 23  | hypothetical protein               |           | hypothetical protein               |           | putative holin                     | G181_gp21  |
| 24  | putative terminase                 | G181_gp18 | putative terminase                 | G181_gp18 | hypothetical protein               | G181_gp22  |
| 25  | hypothetical protein               | G181_gp19 | hypothetical protein               | G181_gp19 | hypothetical protein               | G181_gp23  |
| 26  | hypothetical protein               | G181_gp20 | hypothetical protein               | G181_gp20 | hypothetical protein               | G181_gp24  |
| 27  | putative holin                     | G181_gp21 | putative holin                     | G181_gp21 | hypothetical protein               | G181_gp25  |
| 28  | hypothetical protein               | G181_gp22 | hypothetical protein               | G181_gp22 | hypothetical protein               | G181_gp26  |
| 29  | hypothetical protein               | G181_gp23 | hypothetical protein               | G181_gp23 | hypothetical protein               | G181_gp27  |
| 30  | hypothetical protein               | G181_gp24 | hypothetical protein               | G181_gp24 | mitogen-activated protein kinase 1 | G181_gp28  |
| 31  | hypothetical protein               | G181_gp25 | hypothetical protein               | G181_gp25 | hypothetical protein               | G181_gp29  |
| 32  | hypothetical protein               | G181_gp26 | hypothetical protein               | G181_gp26 | hypothetical protein               | G181_gp29  |
| 33  | hypothetical protein               | G181_gp27 | hypothetical protein               | G181_gp27 | hypothetical protein               | G181_gp30  |
| 34  | mitogen-activated protein kinase 1 | G181_gp28 | mitogen-activated protein kinase 1 | G181_gp28 |                                    |            |
| 35  | hypothetical protein               | G181_gp29 | hypothetical protein               | G181_gp29 |                                    |            |
| 36  | hypothetical protein               | G181_gp30 |                                    |           |                                    |            |
| 37  |                                    |           |                                    |           |                                    |            |
| 38  |                                    |           |                                    |           |                                    |            |
| 39  |                                    |           |                                    |           |                                    |            |

Note: dark blue background - Coding Sequence (CDS) just annotated with RAST not with PHAST; yellow - CDS just annotated with PHAST not with RAST; grey - phage locus\_tag repeated due to the presence of a stop.



| ORF Sw-577-G                          | KHP30     | Sw-A626-G                          | KHP30     | Pt-B89-G                           | KHP30            |
|---------------------------------------|-----------|------------------------------------|-----------|------------------------------------|------------------|
| 1 hypothetical protein                |           | hypothetical protein               | G181_gp01 | hypothetical protein               |                  |
| 2 hypothetical protein                | G181_gp01 | hypothetical protein               |           | hypothetical protein               |                  |
| 3 hypothetical protein                |           | Integrase                          | G181_gp02 | Integrase                          | G181_gp02        |
| 4 Integrase                           | G181_gp02 | hypothetical protein               | G181_gp03 | hypothetical protein               | G181_gp03        |
| 5 hypothetical protein                | G181_gp03 | hypothetical protein               | G181_gp04 | hypothetical protein               | G181_gp04        |
| 6 hypothetical protein                | G181_gp04 | hypothetical protein               | G181_gp05 | hypothetical protein               | G181_gp05        |
| 7 hypothetical protein                | G181_gp05 | hypothetical protein               | G181_gp06 | hypothetical protein               | G181_gp06        |
| 8 hypothetical protein                | G181_gp06 | DNA helicase                       | G181_gp07 | Replicative DNA helicase           | G181_gp08        |
| 9 DNA helicase                        | G181_gp07 | Replicative DNA helicase           | G181_gp08 | DNA primase                        | G181_gp08        |
| 10 Replicative DNA helicase           | G181_gp08 | DNA primase                        | G181_gp09 | Prolipoprotein                     | G181_gp10        |
| 11 DNA primase                        | G181_gp09 | Chromosome partition protein smc   | G181_gp10 | hypothetical protein               | G181_gp11        |
| 12 Prolipoprotein                     | G181_gp10 | hypothetical protein               |           | hypothetical protein               | G181_gp11        |
| 13 hypothetical protein               | G181_gp11 | hypothetical protein               |           | hypothetical protein               | <b>G181_gp15</b> |
| 14 hypothetical protein               |           | tail fiber protein                 |           | hypothetical protein               | G181_gp12        |
| 15 putative tail fiber                |           | putative tail fiber                |           | hypothetical protein               | G181_gp13        |
| 16 hypothetical protein               | G181_gp15 | putative tail assembly protein     |           | structural protein                 | G181_gp14        |
| 17 hypothetical protein               | G181_gp16 | hypothetical protein               |           | hypothetical protein               | G181_gp15        |
| 18 Portal protein                     | G181_gp17 | hypothetical protein               | G181_gp12 | hypothetical protein               | G181_gp16        |
| 19 putative terminase                 | G181_gp18 | hypothetical protein               | G181_gp13 | Portal protein                     | G181_gp17        |
| 20 hypothetical protein               | G181_gp19 | structural protein                 | G181_gp14 | putative terminase                 | G181_gp18        |
| 21 hypothetical protein               | G181_gp20 | structural protein                 | G181_gp14 | hypothetical protein               | G181_gp19        |
| 22 putative holin                     | G181_gp21 | hypothetical protein               | G181_gp15 | hypothetical protein               | G181_gp20        |
| 23 hypothetical protein               | G181_gp22 | hypothetical protein               | G181_gp16 | putative holin                     | G181_gp21        |
| 24 hypothetical protein               | G181_gp23 | Portal protein                     | G181_gp17 | hypothetical protein               | G181_gp22        |
| 25 hypothetical protein               | G181_gp24 | putative terminase                 | G181_gp18 | hypothetical protein               | G181_gp23        |
| 26 hypothetical protein               | G181_gp25 | hypothetical protein               | G181_gp19 | hypothetical protein               | G181_gp24        |
| 27 hypothetical protein               | G181_gp26 | hypothetical protein               | G181_gp20 | hypothetical protein               | G181_gp25        |
| 28 hypothetical protein               | G181_gp27 | putative holin                     | G181_gp21 | hypothetical protein               | G181_gp26        |
| 29 mitogen-activated protein kinase 1 | G181_gp28 | hypothetical protein               | G181_gp22 | hypothetical protein               | G181_gp27        |
| 30 hypothetical protein               | G181_gp29 | hypothetical protein               | G181_gp23 | mitogen-activated protein kinase 1 | G181_gp28        |
| 31 hypothetical protein               | G181_gp30 | hypothetical protein               | G181_gp24 | hypothetical protein               | G181_gp29        |
| 32 hypothetical protein               |           | hypothetical protein               | G181_gp25 | hypothetical protein               | G181_gp30        |
| 33                                    |           | hypothetical protein               | G181_gp26 |                                    |                  |
| 34                                    |           | hypothetical protein               | G181_gp27 |                                    |                  |
| 35                                    |           | mitogen-activated protein kinase 1 | G181_gp28 |                                    |                  |
| 36                                    |           | hypothetical protein               | G181_gp29 |                                    |                  |
| 37                                    |           | hypothetical protein               | G181_gp30 |                                    |                  |
| 38                                    |           |                                    |           |                                    |                  |
| 39                                    |           |                                    |           |                                    |                  |

| ORF Pt-1293-U                             | KHP30     | Fr-ANT170-U                        | KHP30     | Fr-MEG235-U                        | KHP30     |
|-------------------------------------------|-----------|------------------------------------|-----------|------------------------------------|-----------|
| 1 hypothetical protein                    | G181_gp01 | hypothetical protein               | G181_gp01 | hypothetical protein               | G181_gp01 |
| 2 hypothetical protein                    |           | hypothetical protein               |           | hypothetical protein               |           |
| 3 Integrase                               | G181_gp02 | Integrase                          | G181_gp02 | Integrase                          | G181_gp02 |
| 4 hypothetical protein                    | G181_gp03 | Integrase                          | G181_gp02 | Integrase                          | G181_gp02 |
| 5 hypothetical protein                    | G181_gp04 | hypothetical protein               | G181_gp03 | hypothetical protein               | G181_gp03 |
| 6 hypothetical protein                    | G181_gp05 | hypothetical protein               | G181_gp04 | hypothetical protein               | G181_gp04 |
| 7 DNA helicase                            | G181_gp07 | hypothetical protein               | G181_gp05 | FIG00711007: hypothetical protein  | G181_gp05 |
| 8 Replicative DNA helicase                | G181_gp08 | hypothetical protein               | G181_gp06 | hypothetical protein               | G181_gp06 |
| 9 DNA primase                             | G181_gp09 | DNA helicase                       | G181_gp07 | DNA helicase                       | G181_gp07 |
| 10 DNA primase                            | G181_gp09 | Replicative DNA helicase           | G181_gp08 | Replicative DNA helicase           | G181_gp08 |
| 11 Exonuclease SbcC                       | G181_gp10 | DNA primase                        | G181_gp09 | DNA primase                        | G181_gp09 |
| 12 hypothetical protein                   | G181_gp11 | Prolipoprotein                     | G181_gp10 | Prolipoprotein                     | G181_gp10 |
| 13 hypothetical protein                   |           | hypothetical protein               | G181_gp11 | hypothetical protein               | G181_gp11 |
| 14 hypothetical protein                   |           | ISHp608 transposase (OrfB)         |           | ISHp608 transposase (OrfB)         |           |
| 15 hypothetical protein                   | G181_gp12 | Mobile element protein (OrfA)      |           | Mobile element protein (OrfA)      |           |
| 16 hypothetical protein                   | G181_gp13 | hypothetical protein               | G181_gp13 | hypothetical protein               | G181_gp13 |
| 17 structural protein                     | G181_gp14 | structural protein                 | G181_gp14 | structural protein                 | G181_gp14 |
| 18 Mobile element protein (tnpA)          |           | hypothetical protein               | G181_gp15 | hypothetical protein               | G181_gp15 |
| 19 IS607 Mobile element protein (tnpB)    |           | hypothetical protein               | G181_gp16 | hypothetical protein               | G181_gp16 |
| 20 structural protein                     | G181_gp14 | Mobile element protein (OrfA)      |           | Mobile element protein (OrfA)      |           |
| 21 hypothetical protein                   | G181_gp15 | ISHp608 transposase (OrfB)         |           | ISHp608 transposase (OrfB)         |           |
| 22 hypothetical protein                   | G181_gp16 | hypothetical protein               | G181_gp16 | hypothetical protein               | G181_gp16 |
| 23 Portal protein                         | G181_gp17 | Portal protein                     | G181_gp17 | Portal protein                     | G181_gp17 |
| 24 putative terminase                     | G181_gp18 | putative terminase                 | G181_gp18 | putative terminase                 | G181_gp18 |
| 25 hypothetical protein                   | G181_gp19 | hypothetical protein               |           | hypothetical protein               |           |
| 26 hypothetical protein                   | G181_gp20 | hypothetical protein               | G181_gp20 | hypothetical protein               | G181_gp20 |
| 27 putative holin                         | G181_gp21 | putative holin                     | G181_gp21 | putative holin                     | G181_gp21 |
| 28 hypothetical protein                   | G181_gp22 | hypothetical protein               | G181_gp22 | hypothetical protein               | G181_gp22 |
| 29 hypothetical protein                   | G181_gp23 | hypothetical protein               | G181_gp23 | hypothetical protein               | G181_gp23 |
| 30 hypothetical protein                   | G181_gp24 | hypothetical protein               | G181_gp24 | hypothetical protein               | G181_gp24 |
| 31 Transcriptional regulator, MerR family | G181_gp25 | hypothetical protein               | G181_gp25 | hypothetical protein               | G181_gp25 |
| 32 hypothetical protein                   | G181_gp26 | hypothetical protein               | G181_gp26 | hypothetical protein               | G181_gp26 |
| 33 hypothetical protein                   | G181_gp27 | hypothetical protein               | G181_gp27 | hypothetical protein               | G181_gp27 |
| 34 mitogen-activated protein kinase 1     | G181_gp28 | mitogen-activated protein kinase 1 | G181_gp28 | mitogen-activated protein kinase 1 | G181_gp28 |
| 35 hypothetical protein                   | G181_gp29 | mitogen-activated protein kinase 1 |           | mitogen-activated protein kinase 1 |           |
| 36 hypothetical protein                   | G181_gp30 | hypothetical protein               | G181_gp29 | hypothetical protein               | G181_gp29 |
| 37                                        |           | hypothetical protein               | G181_gp30 | hypothetical protein               | G181_gp30 |
| 38                                        |           |                                    |           |                                    |           |
| 39                                        |           |                                    |           |                                    |           |

| ORF Pt-5771-G                         | KHP30     | Pt-5322-G                          | KHP30     | Pt-B92-G                                   | KHP30     |
|---------------------------------------|-----------|------------------------------------|-----------|--------------------------------------------|-----------|
| 1 hypothetical protein                | G181_gp01 | hypothetical protein               | G181_gp01 | hypothetical protein                       | G181_gp01 |
| 2 hypothetical protein                |           | hypothetical protein               |           | hypothetical protein                       |           |
| 3 Integrase                           | G181_gp02 | Integrase                          | G181_gp02 | Integrase                                  | G181_gp02 |
| 4 hypothetical protein                | G181_gp03 | hypothetical protein               | G181_gp03 | hypothetical protein                       | G181_gp03 |
| 5 hypothetical protein                | G181_gp04 | hypothetical protein               | G181_gp04 | hypothetical protein                       | G181_gp04 |
| 6 hypothetical protein                | G181_gp05 | hypothetical protein               | G181_gp05 | hypothetical protein                       | G181_gp05 |
| 7 DNA helicase                        | G181_gp07 | DNA helicase                       | G181_gp07 | hypothetical protein                       | G181_gp06 |
| 8 Replicative DNA helicase            | G181_gp08 | Replicative DNA helicase           | G181_gp08 | DNA helicase                               | G181_gp07 |
| 9 DNA primase                         | G181_gp09 | DNA primase                        | G181_gp09 | Replicative DNA helicase                   | G181_gp08 |
| 10 hypothetical protein               | G181_gp10 | hypothetical protein               | G181_gp10 | DNA primase                                | G181_gp09 |
| 11 hypothetical protein               | G181_gp11 | hypothetical protein               | G181_gp11 | hypothetical protein                       | G181_gp10 |
| 12 hypothetical protein               |           | hypothetical protein               |           | IS605 transposase (tnpA)                   |           |
| 13 putative tail fiber                |           | hypothetical protein               | G181_gp12 | Mobile element protein (tnpB)              |           |
| 14 putative tail assembly protein     |           | hypothetical protein               | G181_gp13 | hypothetical protein                       | G181_gp10 |
| 15 hypothetical protein               |           | structural protein                 | G181_gp14 | hypothetical protein                       | G181_gp11 |
| 16 hypothetical protein               | G181_gp12 | hypothetical protein               | G181_gp15 | Tail fiber protein                         |           |
| 17 hypothetical protein               | G181_gp13 | hypothetical protein               | G181_gp16 | putative tail fiber                        |           |
| 18 structural protein                 | G181_gp14 | Portal protein                     | G181_gp17 | putative tail assembly protein             |           |
| 19 hypothetical protein               | G181_gp15 | putative terminase                 | G181_gp18 | hypothetical protein                       |           |
| 20 hypothetical protein               | G181_gp16 | hypothetical protein               | G181_gp19 | hypothetical protein                       | G181_gp12 |
| 21 Portal protein                     | G181_gp17 | hypothetical protein               | G181_gp20 | hypothetical protein                       | G181_gp13 |
| 22 putative terminase                 | G181_gp18 | putative holin                     | G181_gp21 | structural protein                         | G181_gp14 |
| 23 hypothetical protein               | G181_gp19 | hypothetical protein               | G181_gp22 | hypothetical protein                       | G181_gp15 |
| 24 hypothetical protein               | G181_gp20 | hypothetical protein               | G181_gp23 | hypothetical protein                       | G181_gp16 |
| 25 putative holin                     | G181_gp21 | hypothetical protein               | G181_gp24 | Portal protein                             | G181_gp17 |
| 26 hypothetical protein               | G181_gp22 | hypothetical protein               | G181_gp25 | hypothetical protein                       |           |
| 27 hypothetical protein               | G181_gp23 | hypothetical protein               | G181_gp26 | putative terminase                         | G181_gp18 |
| 28 hypothetical protein               | G181_gp24 | hypothetical protein               | G181_gp27 | hypothetical protein                       | G181_gp19 |
| 29 hypothetical protein               | G181_gp25 | mitogen-activated protein kinase 1 | G181_gp28 | hypothetical protein                       | G181_gp20 |
| 30 hypothetical protein               | G181_gp26 | hypothetical protein               | G181_gp29 | putative holin                             | G181_gp21 |
| 31 hypothetical protein               | G181_gp27 | hypothetical protein               | G181_gp30 | hypothetical protein                       | G181_gp22 |
| 32 mitogen-activated protein kinase 1 | G181_gp28 |                                    |           | hypothetical protein                       | G181_gp23 |
| 33 hypothetical protein               | G181_gp29 |                                    |           | hypothetical protein                       | G181_gp24 |
| 34 hypothetical protein               | G181_gp30 |                                    |           | hypothetical protein                       | G181_gp25 |
| 35                                    |           |                                    |           | hypothetical protein                       | G181_gp26 |
| 36                                    |           |                                    |           | hypothetical protein                       | G181_gp27 |
| 37                                    |           |                                    |           | mitogen-activated protein kinase 1         | G181_gp28 |
| 38                                    |           |                                    |           | hypothetical protein                       | G181_gp29 |
| 39                                    |           |                                    |           | putative transcriptional regulator protein |           |

| ORF Pt-4481-G                         | KHP30            | Fr-GC43-G                          | KHP30     | Fr-G12-G                           | KHP30            |
|---------------------------------------|------------------|------------------------------------|-----------|------------------------------------|------------------|
| 1 hypothetical protein                |                  | hypothetical protein               | G181_gp01 | hypothetical protein               | G181_gp01        |
| 2 Exonuclease SbcC                    | <b>G181_gp10</b> | Integrase                          | G181_gp02 | Integrase                          | <b>G181_gp02</b> |
| 3 DNA primase                         | <b>G181_gp09</b> | hypothetical protein               | G181_gp03 | Integrase                          | <b>G181_gp02</b> |
| 4 Replicative DNA helicase            | <b>G181_gp08</b> | hypothetical protein               | G181_gp04 | hypothetical protein               | G181_gp03        |
| 5 hypothetical protein                | <b>G181_gp06</b> | hypothetical protein               |           | hypothetical protein               | G181_gp04        |
| 6 hypothetical protein                | <b>G181_gp05</b> | hypothetical protein               | G181_gp05 | hypothetical protein               |                  |
| 7 hypothetical protein                | <b>G181_gp04</b> | hypothetical protein               | G181_gp06 | hypothetical protein               | G181_gp05        |
| 8 hypothetical protein                | <b>G181_gp03</b> | putative DNA helicase              | G181_gp08 | hypothetical protein               | G181_gp06        |
| 9 Integrase                           | <b>G181_gp02</b> | DNA primase                        | G181_gp09 | hypothetical protein               |                  |
| 10 hypothetical protein               |                  | Mobile element protein (tnpB)      |           | putative DNA helicase              | G181_gp08        |
| 11 hypothetical protein               | <b>G181_gp01</b> | IS605 transposase (tnpA)           |           | DNA primase                        | G181_gp09        |
| 12 JHP1044-like mosaic region protein |                  | Exonuclease sbcC                   | G181_gp10 | hypothetical protein               | G181_gp10        |
| 13 hypothetical protein               |                  | hypothetical protein               | G181_gp11 | hypothetical protein               | G181_gp11        |
| 14 hypothetical protein               | G181_gp12        | hypothetical protein               |           | hypothetical protein               |                  |
| 15 hypothetical protein               |                  | putative tail fiber                |           | putative tail fiber                |                  |
| 16 hypothetical protein               | G181_gp13        | putative tail assembly protein     |           | putative tail assembly protein     |                  |
| 17 structural protein                 | G181_gp14        | hypothetical protein               |           | hypothetical protein               |                  |
| 18 hypothetical protein               | G181_gp15        | hypothetical protein               | G181_gp12 | hypothetical protein               | G181_gp12        |
| 19 hypothetical protein               | G181_gp16        | hypothetical protein               | G181_gp13 | hypothetical protein               | G181_gp13        |
| 20 Portal protein                     | G181_gp17        | structural protein                 | G181_gp14 | structural protein                 | G181_gp14        |
| 21 putative terminase                 | G181_gp18        | hypothetical protein               | G181_gp15 | hypothetical protein               | G181_gp15        |
| 22 hypothetical protein               | G181_gp19        | hypothetical protein               | G181_gp16 | hypothetical protein               | G181_gp16        |
| 23 hypothetical protein               | G181_gp20        | Portal protein                     | G181_gp17 | Portal protein                     | G181_gp17        |
| 24 putative holin                     | G181_gp21        | putative terminase                 | G181_gp18 | putative terminase                 | G181_gp18        |
| 25 hypothetical protein               | G181_gp22        | hypothetical protein               | G181_gp19 | hypothetical protein               | G181_gp19        |
| 26 hypothetical protein               | G181_gp23        | hypothetical protein               | G181_gp20 | hypothetical protein               | G181_gp20        |
| 27 hypothetical protein               | G181_gp24        | putative holin                     | G181_gp21 | putative holin                     | G181_gp21        |
| 28 hypothetical protein               | G181_gp25        | IS605 transposase (tnpA)           |           | hypothetical protein               | G181_gp22        |
| 29 hypothetical protein               | G181_gp26        | Mobile element protein (tnpB)      |           | hypothetical protein               | G181_gp23        |
| 30 hypothetical protein               | G181_gp27        | hypothetical protein               | G181_gp22 | hypothetical protein               | G181_gp24        |
| 31 mitogen-activated protein kinase 1 | G181_gp28        | hypothetical protein               | G181_gp23 | hypothetical protein               | G181_gp25        |
| 32 hypothetical protein               | G181_gp29        | hypothetical protein               | G181_gp24 | hypothetical protein               | G181_gp26        |
| 33 hypothetical protein               | G181_gp30        | hypothetical protein               | G181_gp25 | hypothetical protein               | G181_gp27        |
| 34                                    |                  | hypothetical protein               | G181_gp26 | mitogen-activated protein kinase 1 | G181_gp28        |
| 35                                    |                  | hypothetical protein               | G181_gp27 | hypothetical protein               | G181_gp29        |
| 36                                    |                  | mitogen-activated protein kinase 1 | G181_gp28 | hypothetical protein               | G181_gp30        |
| 37                                    |                  | hypothetical protein               | G181_gp29 |                                    |                  |
| 38                                    |                  | hypothetical protein               | G181_gp30 |                                    |                  |
| 39                                    |                  | hypothetical protein               |           |                                    |                  |

| ORF Fr-B58-M                             | KHP30     | Pt-1918-U                          | KHP30     | Pt-4497-U                          | KHP30     |
|------------------------------------------|-----------|------------------------------------|-----------|------------------------------------|-----------|
| 1 hypothetical protein                   | G181_gp01 | hypothetical protein               | G181_gp01 | hypothetical protein               |           |
| 2 Integrase                              | G181_gp02 | Integrase                          | G181_gp02 | hypothetical protein               | G181_gp01 |
| 3 First ORF in transposon ISC1904 (tnpA) |           | hypothetical protein               | G181_gp03 | Integrase                          | G181_gp02 |
| 4 IS607 Mobile element protein (tnpB)    |           | hypothetical protein               | G181_gp04 | hypothetical protein               | G181_gp03 |
| 5 DNA primase                            | G181_gp09 | hypothetical protein               |           | hypothetical protein               | G181_gp04 |
| 6 hypothetical protein                   | G181_gp10 | hypothetical protein               | G181_gp05 | hypothetical protein               |           |
| 7 hypothetical protein                   | G181_gp11 | hypothetical protein               | G181_gp06 | hypothetical protein               | G181_gp05 |
| 8 hypothetical protein                   |           | putative DNA helicase              | G181_gp08 | hypothetical protein               | G181_gp06 |
| 9 hypothetical protein                   | G181_gp12 | DNA primase                        | G181_gp09 | putative DNA helicase              | G181_gp08 |
| 10 hypothetical protein                  | G181_gp13 | hypothetical protein               | G181_gp10 | DNA primase                        | G181_gp09 |
| 11 structural protein                    | G181_gp14 | hypothetical protein               | G181_gp11 | Exonuclease SbcC                   | G181_gp10 |
| 12 hypothetical protein                  | G181_gp15 | tail fiber protein                 |           | hypothetical protein               | G181_gp11 |
| 13 hypothetical protein                  | G181_gp16 | putative tail fiber                |           | hypothetical protein               |           |
| 14 Portal protein                        | G181_gp17 | putative tail assembly protein     |           | putative tail fiber                |           |
| 15 putative terminase                    | G181_gp18 | hypothetical protein               |           | putative tail assembly protein     |           |
| 16 hypothetical protein                  | G181_gp19 | hypothetical protein               | G181_gp12 | hypothetical protein               |           |
| 17 hypothetical protein                  | G181_gp20 | hypothetical protein               | G181_gp13 | hypothetical protein               | G181_gp12 |
| 18 putative holin                        | G181_gp21 | structural protein                 | G181_gp14 | hypothetical protein               |           |
| 19 hypothetical protein                  | G181_gp23 | hypothetical protein               | G181_gp15 | hypothetical protein               | G181_gp13 |
| 20 hypothetical protein                  | G181_gp24 | hypothetical protein               | G181_gp16 | structural protein                 | G181_gp14 |
| 21 hypothetical protein                  | G181_gp25 | Portal protein                     | G181_gp17 | hypothetical protein               | G181_gp15 |
| 22 hypothetical protein                  | G181_gp26 | putative terminase                 | G181_gp18 | hypothetical protein               | G181_gp16 |
| 23 hypothetical protein                  | G181_gp27 | hypothetical protein               | G181_gp19 | Portal protein                     | G181_gp17 |
| 24 mitogen-activated protein kinase 1    | G181_gp28 | hypothetical protein               | G181_gp20 | putative terminase                 | G181_gp18 |
| 25 hypothetical protein                  | G181_gp29 | putative holin                     | G181_gp21 | hypothetical protein               | G181_gp19 |
| 26 hypothetical protein                  | G181_gp30 | hypothetical protein               | G181_gp22 | hypothetical protein               | G181_gp20 |
| 27                                       |           | hypothetical protein               | G181_gp23 | putative holin                     | G181_gp21 |
| 28                                       |           | hypothetical protein               | G181_gp24 | hypothetical protein               | G181_gp22 |
| 29                                       |           | hypothetical protein               | G181_gp25 | hypothetical protein               | G181_gp23 |
| 30                                       |           | hypothetical protein               | G181_gp26 | hypothetical protein               | G181_gp24 |
| 31                                       |           | hypothetical protein               | G181_gp27 | hypothetical protein               | G181_gp25 |
| 32                                       |           | mitogen-activated protein kinase 1 | G181_gp28 | hypothetical protein               | G181_gp26 |
| 33                                       |           | hypothetical protein               | G181_gp29 | hypothetical protein               | G181_gp27 |
| 34                                       |           | hypothetical protein               | G181_gp30 | mitogen-activated protein kinase 1 | G181_gp28 |
| 35                                       |           |                                    |           | hypothetical protein               | G181_gp29 |
| 36                                       |           |                                    |           | hypothetical protein               | G181_gp30 |
| 37                                       |           |                                    |           |                                    |           |
| 38                                       |           |                                    |           |                                    |           |
| 39                                       |           |                                    |           |                                    |           |

| ORF Pt-4472-G                         | KHP30     | Pt-212-U                                                                | phiHP33/KHP30 | Fr-B41-M                           | KHP30     |
|---------------------------------------|-----------|-------------------------------------------------------------------------|---------------|------------------------------------|-----------|
| 1 hypothetical protein                | G181_gp01 | hypothetical protein                                                    | phiHP33_gp01  | hypothetical protein               | G181_gp01 |
| 2 Integrase                           | G181_gp02 | Integrase                                                               | phiHP33_gp02  | Integrase                          | G181_gp02 |
| 3 hypothetical protein                | G181_gp03 | hypothetical protein                                                    | phiHP33_gp03  | hypothetical protein               | G181_gp03 |
| 4 hypothetical protein                | G181_gp04 | putative transcriptional regulator                                      | phiHP33_gp04  | hypothetical protein               | G181_gp04 |
| 5 hypothetical protein                | G181_gp05 | putative phage replication protein                                      | phiHP33_gp05  | hypothetical protein               |           |
| 6 DNA helicase                        | G181_gp07 | putative ABC binding cassette transporter                               | phiHP33_gp06  | hypothetical protein               | G181_gp05 |
| 7 putative DNA helicase               | G181_gp08 | hypothetical protein                                                    | phiHP33_gp07  | hypothetical protein               | G181_gp06 |
| 8 putative DNA helicase               | G181_gp08 | Replicative DNA helicase                                                | phiHP33_gp08  | putative DNA helicase              | G181_gp08 |
| 9 DNA primase                         | G181_gp09 | DNA primase                                                             | phiHP33_gp09  | DNA primase                        | G181_gp09 |
| 10 hypothetical protein               | G181_gp10 | Exonuclease SbcC                                                        | phiHP33_gp10  | hypothetical protein               | G181_gp10 |
| 11 hypothetical protein               | G181_gp11 | JHP1044 mosaic, putative crystallin beta/gamma motif-containing protein | phiHP33_gp12  | hypothetical protein               | G181_gp11 |
| 12 hypothetical protein               | G181_gp11 | hypothetical protein                                                    | phiHP33_gp14  | tail fiber protein                 |           |
| 13 hypothetical protein               |           | putative histidine kinase                                               | phiHP33_gp15  | putative tail fiber                |           |
| 14 hypothetical protein               | G181_gp12 | putative histidine kinase                                               | phiHP33_gp16  | putative tail assembly protein     |           |
| 15 hypothetical protein               | G181_gp13 | putative sensor protein                                                 | phiHP33_gp17  | hypothetical protein               |           |
| 16 structural protein                 | G181_gp14 | hypothetical protein                                                    | phiHP33_gp18  | hypothetical protein               | G181_gp12 |
| 17 hypothetical protein               | G181_gp15 | hypothetical protein                                                    | phiHP33_gp19  | hypothetical protein               |           |
| 18 hypothetical protein               | G181_gp16 | Portal protein                                                          | G181_gp24     | hypothetical protein               | G181_gp13 |
| 19 Portal protein                     | G181_gp17 | phage uncharacterized protein, putative                                 |               | structural protein                 | G181_gp14 |
| 20 putative terminase                 | G181_gp18 | putative DNA repair protein                                             | phiHP33_gp23  | hypothetical protein               | G181_gp15 |
| 21 hypothetical protein               | G181_gp19 | hypothetical protein                                                    | phiHP33_gp24  | hypothetical protein               | G181_gp16 |
| 22 hypothetical protein               | G181_gp20 | mitogen-activated protein kinase 1                                      | phiHP33_gp25  | Portal protein                     | G181_gp17 |
| 23 putative holin                     | G181_gp21 | hypothetical protein                                                    | phiHP33_gp26  | putative terminase                 | G181_gp18 |
| 24 hypothetical protein               | G181_gp22 | putative transcriptional regulator protein                              | phiHP33_gp27  | hypothetical protein               | G181_gp19 |
| 25 hypothetical protein               | G181_gp23 |                                                                         |               | hypothetical protein               | G181_gp20 |
| 26 hypothetical protein               | G181_gp24 |                                                                         |               | putative holin                     | G181_gp21 |
| 27 hypothetical protein               | G181_gp25 |                                                                         |               | hypothetical protein               | G181_gp22 |
| 28 hypothetical protein               | G181_gp26 |                                                                         |               | hypothetical protein               | G181_gp23 |
| 29 hypothetical protein               | G181_gp27 |                                                                         |               | hypothetical protein               | G181_gp24 |
| 30 mitogen-activated protein kinase 1 | G181_gp28 |                                                                         |               | hypothetical protein               | G181_gp25 |
| 31 hypothetical protein               | G181_gp29 |                                                                         |               | hypothetical protein               | G181_gp26 |
| 32 hypothetical protein               | G181_gp30 |                                                                         |               | hypothetical protein               | G181_gp27 |
| 33                                    |           |                                                                         |               | mitogen-activated protein kinase 1 |           |
| 34                                    |           |                                                                         |               | hypothetical protein               | G181_gp29 |
| 35                                    |           |                                                                         |               | hypothetical protein               | G181_gp30 |
| 36                                    |           |                                                                         |               | hypothetical protein               |           |
| 37                                    |           |                                                                         |               |                                    |           |
| 38                                    |           |                                                                         |               |                                    |           |
| 39                                    |           |                                                                         |               |                                    |           |

**ORF Pt-1846-U**

- 1 hypothetical protein
- 2 hypothetical protein
- 3 Integrase
- 4 hypothetical protein
- 5 hypothetical protein
- 6 hypothetical protein
- 7 hypothetical protein
- 8 DNA helicase
- 9 Replicative DNA helicase
- 10 DNA primase
- 11 Exonuclease sbcC
- 12 JHP1044 mosaic, putative crystallin beta/gamma motif-containing protein
- 13 hypothetical protein
- 14 hypothetical protein
- 15 hypothetical protein
- 16 structural protein
- 17 hypothetical protein
- 18 hypothetical protein
- 19 Portal protein
- 20 putative terminase
- 21 hypothetical protein
- 22 hypothetical protein
- 23 putative holin
- 24 hypothetical protein
- 25 hypothetical protein
- 26 hypothetical protein
- 27 hypothetical protein
- 28 hypothetical protein
- 29 hypothetical protein
- 30 mitogen-activated protein kinase 1
- 31 hypothetical protein
- 32 hypothetical protein
- 33
- 34
- 35
- 36
- 37
- 38
- 39

**KHP30**

- G181\_gp01
- G181\_gp02
- G181\_gp03
- G181\_gp04
- G181\_gp05
- G181\_gp06
- G181\_gp07
- G181\_gp08
- G181\_gp09
- G181\_gp10
- G181\_gp12
- G181\_gp13
- G181\_gp14
- G181\_gp15
- G181\_gp16
- G181\_gp17
- G181\_gp18
- G181\_gp19
- G181\_gp20
- G181\_gp21
- G181\_gp22
- G181\_gp23
- G181\_gp24
- G181\_gp25
- G181\_gp26
- G181\_gp27
- G181\_gp28
- G181\_gp29
- G181\_gp30

**Pt-228\_99-G**

- hypothetical protein
- hypothetical protein
- Integrase
- hypothetical protein
- hypothetical protein
- hypothetical protein
- hypothetical protein
- DNA helicase
- Replicative DNA helicase
- Mobile element protein (OrfA)
- ISHp608 transposase (OrfB)
- DNA primase
- Exonuclease SbcC
- hypothetical protein
- hypothetical protein
- hypothetical protein
- hypothetical protein
- structural protein
- Mobile element protein (OrfA)
- ISHp608 transposase (OrfB)
- structural protein
- hypothetical protein
- hypothetical protein
- Portal protein
- putative terminase
- hypothetical protein
- hypothetical protein
- putative holin
- hypothetical protein
- hypothetical protein
- hypothetical protein
- mitogen-activated protein kinase 1
- hypothetical protein
- hypothetical protein
- hypothetical protein
- hypothetical protein

**KHP30**

- G181\_gp01
- G181\_gp02
- G181\_gp03
- G181\_gp04
- G181\_gp05
- G181\_gp06
- G181\_gp07
- G181\_gp08
- G181\_gp09
- G181\_gp10
- G181\_gp11
- G181\_gp12
- G181\_gp13
- G181\_gp14
- G181\_gp14
- G181\_gp15
- G181\_gp16
- G181\_gp17
- G181\_gp18
- G181\_gp19
- G181\_gp20
- G181\_gp21
- G181\_gp22
- G181\_gp23
- G181\_gp24
- G181\_gp25
- G181\_gp26
- G181\_gp27
- G181\_gp28
- G181\_gp29
- G181\_gp30

**Table S4. Remnant prophages coding sequences.**

| ORF | Sw-C388-G                              | KHP30     | Sw-C520-G                                                               | phiHP33      | Is-3180-G                          | KHP30     |
|-----|----------------------------------------|-----------|-------------------------------------------------------------------------|--------------|------------------------------------|-----------|
| 1   | hypothetical protein                   | G181_gp01 | hypothetical protein                                                    |              | hypothetical protein               | G181_gp01 |
| 2   | hypothetical protein                   |           | hypothetical protein                                                    | phiHP33_gp01 | hypothetical protein               |           |
| 3   | Integrase                              | G181_gp02 | hypothetical protein                                                    |              | Integrase                          | G181_gp02 |
| 4   | hypothetical protein                   | G181_gp03 | Integrase                                                               | phiHP33_gp02 | hypothetical protein               | G181_gp03 |
| 5   | hypothetical protein                   | G181_gp13 | hypothetical protein                                                    | phiHP33_gp03 | hypothetical protein               | G181_gp04 |
| 6   | structural protein                     | G181_gp14 | putative transcriptional regulator                                      | phiHP33_gp04 | hypothetical protein               | G181_gp05 |
| 7   | hypothetical protein                   | G181_gp20 | putative phage replication protein                                      | phiHP33_gp05 | hypothetical protein               | G181_gp06 |
| 8   | putative holin                         | G181_gp21 | hypothetical protein                                                    | phiHP33_gp07 | Replicative DNA helicase           | G181_gp08 |
| 9   | hypothetical protein                   | G181_gp22 | Replicative DNA helicase                                                | phiHP33_gp08 | DNA primase                        | G181_gp09 |
| 10  | hypothetical protein                   | G181_gp22 | DNA primase                                                             | phiHP33_gp09 | Mobile element protein (OrfA)      |           |
| 11  | hypothetical protein                   | G181_gp23 | hypothetical protein                                                    | phiHP33_gp11 | ISHp608 transposase (OrfB)         |           |
| 12  | hypothetical protein                   | G181_gp24 | JHP1044 mosaic, putative crystallin beta/gamma motif-containing protein | phiHP33_gp12 | structural protein                 | G181_gp14 |
| 13  | hypothetical protein                   | G181_gp25 | tail fiber protein                                                      | phiHP33_gp14 | hypothetical protein               | G181_gp15 |
| 14  | hypothetical protein                   | G181_gp26 | putative sensor protein                                                 | phiHP33_gp17 | hypothetical protein               | G181_gp16 |
| 15  | hypothetical protein                   | G181_gp27 |                                                                         |              | Portal protein                     | G181_gp17 |
| 16  | mitogen-activated protein kinase 1     | G181_gp28 |                                                                         |              | putative terminase                 | G181_gp18 |
| 17  | hypothetical protein                   | G181_gp29 |                                                                         |              | hypothetical protein               | G181_gp19 |
| 18  | hypothetical protein                   | G181_gp30 |                                                                         |              | hypothetical protein               | G181_gp20 |
| 19  | ISCCo1, transposase orfA (IS606, tnpA) |           |                                                                         |              | putative holin                     | G181_gp21 |
| 20  | Mobile element protein (IS606, tnpB)   |           |                                                                         |              | hypothetical protein               | G181_gp22 |
| 21  | Mobile element protein (IS606, tnpB)   |           |                                                                         |              | hypothetical protein               | G181_gp23 |
| 22  |                                        |           |                                                                         |              | hypothetical protein               | G181_gp24 |
| 23  |                                        |           |                                                                         |              | hypothetical protein               | G181_gp25 |
| 24  |                                        |           |                                                                         |              | hypothetical protein               | G181_gp26 |
| 25  |                                        |           |                                                                         |              | hypothetical protein               | G181_gp27 |
| 26  |                                        |           |                                                                         |              | mitogen-activated protein kinase 1 | G181_gp28 |
| 27  |                                        |           |                                                                         |              | hypothetical protein               | G181_gp29 |
| 28  |                                        |           |                                                                         |              | hypothetical protein               | G181_gp30 |
| 29  |                                        |           |                                                                         |              |                                    |           |
| 30  |                                        |           |                                                                         |              |                                    |           |
| 31  |                                        |           |                                                                         |              |                                    |           |
| 32  |                                        |           |                                                                         |              |                                    |           |
| 33  |                                        |           |                                                                         |              |                                    |           |
| 34  |                                        |           |                                                                         |              |                                    |           |
| 35  |                                        |           |                                                                         |              |                                    |           |
| 36  |                                        |           |                                                                         |              |                                    |           |
| 37  |                                        |           |                                                                         |              |                                    |           |
| 38  |                                        |           |                                                                         |              |                                    |           |
| 39  |                                        |           |                                                                         |              |                                    |           |
| 40  |                                        |           |                                                                         |              |                                    |           |
| 41  |                                        |           |                                                                         |              |                                    |           |
| 42  |                                        |           |                                                                         |              |                                    |           |
| 43  |                                        |           |                                                                         |              |                                    |           |
| 44  |                                        |           |                                                                         |              |                                    |           |
| 45  |                                        |           |                                                                         |              |                                    |           |
| 46  |                                        |           |                                                                         |              |                                    |           |

Note: dark blue background - Coding Sequence (CDS) just annotated with RAST not with PHAST; yellow - CDS just annotated with PHAST not with RAST; codon grey - phage locus\_tag repeated due to the presence of a stop.



| ORF | Pt-259-G                                                                | phiHP33      | Pt-5303-G                                                               | phiHP33      | Fr-3842-U                          | KHP30     |
|-----|-------------------------------------------------------------------------|--------------|-------------------------------------------------------------------------|--------------|------------------------------------|-----------|
| 1   | hypothetical protein                                                    | phiHP33_gp01 | hypothetical protein                                                    |              | hypothetical protein               | G181_gp01 |
| 2   | Integrase                                                               | phiHP33_gp02 | Integrase                                                               | phiHP33_gp02 | Integrase                          | G181_gp02 |
| 3   | hypothetical protein                                                    | phiHP33_gp03 | hypothetical protein                                                    | phiHP33_gp03 | hypothetical protein               | G181_gp03 |
| 4   | putative transcriptional regulator                                      | phiHP33_gp04 | hypothetical protein                                                    | phiHP33_gp04 | hypothetical protein               | G181_gp04 |
| 5   | hypothetical protein                                                    |              | hypothetical protein                                                    |              | hypothetical protein               |           |
| 6   | putative phage replication protein                                      | phiHP33_gp05 | hypothetical protein                                                    | phiHP33_gp05 | hypothetical protein               | G181_gp05 |
| 7   | putative ABC binding cassette transporter                               | phiHP33_gp06 | hypothetical protein                                                    | phiHP33_gp06 | hypothetical protein               | G181_gp07 |
| 8   | DNA repair protein                                                      | phiHP33_gp08 | DNA repair protein                                                      | phiHP33_gp08 | putative DNA helicase              | G181_gp08 |
| 9   | hypothetical protein                                                    |              | DNA primase                                                             | phiHP33_gp09 | DNA primase                        | G181_gp09 |
| 10  | DNA primase                                                             | phiHP33_gp09 | putative SMC (structural maintenance of chromosomes) protein            | phiHP33_gp10 | hypothetical protein               | G181_gp10 |
| 11  | Exonuclease SbcC                                                        | phiHP33_gp10 | JHP1044 mosaic, putative crystallin beta/gamma motif-containing protein | phiHP33_gp12 | hypothetical protein               | G181_gp11 |
| 12  | JHP1044 mosaic, putative crystallin beta/gamma motif-containing protein | phiHP33_gp12 | tail fiber protein                                                      |              | hypothetical protein               | G181_gp01 |
| 13  |                                                                         |              | putative tail fiber                                                     |              | hypothetical protein               |           |
| 14  |                                                                         |              | putative tail assembly protein                                          |              | hypothetical protein               |           |
| 15  |                                                                         |              | FIG00710791: hypothetical protein                                       | phiHP33_gp14 | Integrase                          | G181_gp02 |
| 16  |                                                                         |              | putative histidine kinase                                               | phiHP33_gp15 | hypothetical protein               | G181_gp03 |
| 17  |                                                                         |              | putative histidine kinase                                               | phiHP33_gp16 | hypothetical protein               | G181_gp04 |
| 18  |                                                                         |              | Mobile element protein (OrfA)                                           | phiHP33_gp20 | hypothetical protein               | G181_gp05 |
| 19  |                                                                         |              | ISHp608 transposase (OrfB)                                              | phiHP33_gp21 | hypothetical protein               | G181_gp06 |
| 20  |                                                                         |              | hypothetical protein                                                    | phiHP33_gp26 | Replicative DNA helicase           | G181_gp08 |
| 21  |                                                                         |              | putative transcriptional regulator protein                              | phiHP33_gp27 | DNA primase                        | G181_gp09 |
| 22  |                                                                         |              |                                                                         |              | Exonuclease SbcC                   | G181_gp10 |
| 23  |                                                                         |              |                                                                         |              | hypothetical protein               | G181_gp11 |
| 24  |                                                                         |              |                                                                         |              | hypothetical protein               | G181_gp11 |
| 25  |                                                                         |              |                                                                         |              | hypothetical protein               |           |
| 26  |                                                                         |              |                                                                         |              | putative tail fiber                |           |
| 27  |                                                                         |              |                                                                         |              | putative tail assembly protein     |           |
| 28  |                                                                         |              |                                                                         |              | hypothetical protein               |           |
| 29  |                                                                         |              |                                                                         |              | hypothetical protein               | G181_gp12 |
| 30  |                                                                         |              |                                                                         |              | hypothetical protein               | G181_gp13 |
| 31  |                                                                         |              |                                                                         |              | structural protein                 | G181_gp14 |
| 32  |                                                                         |              |                                                                         |              | hypothetical protein               | G181_gp15 |
| 33  |                                                                         |              |                                                                         |              | hypothetical protein               | G181_gp16 |
| 34  |                                                                         |              |                                                                         |              | Portal protein                     | G181_gp17 |
| 35  |                                                                         |              |                                                                         |              | putative terminase                 | G181_gp18 |
| 36  |                                                                         |              |                                                                         |              | hypothetical protein               | G181_gp19 |
| 37  |                                                                         |              |                                                                         |              | hypothetical protein               | G181_gp20 |
| 38  |                                                                         |              |                                                                         |              | putative holin                     | G181_gp21 |
| 39  |                                                                         |              |                                                                         |              | hypothetical protein               | G181_gp22 |
| 40  |                                                                         |              |                                                                         |              | hypothetical protein               | G181_gp23 |
| 41  |                                                                         |              |                                                                         |              | hypothetical protein               | G181_gp24 |
| 42  |                                                                         |              |                                                                         |              | hypothetical protein               | G181_gp25 |
| 43  |                                                                         |              |                                                                         |              | hypothetical protein               | G181_gp26 |
| 44  |                                                                         |              |                                                                         |              | hypothetical protein               | G181_gp27 |
| 45  |                                                                         |              |                                                                         |              | mitogen-activated protein kinase 1 | G181_gp28 |
| 46  |                                                                         |              |                                                                         |              | hypothetical protein               | G181_gp29 |

**Table S5.** Insertion sequences (IS) within intact prophage genomes

| Prophage    | IS      | Copies | Insertion sense* | 5' Flanking gene     | 3' Flanking gene     |
|-------------|---------|--------|------------------|----------------------|----------------------|
| UK-EN31-U   | IS605   | 1      | Inverse          | hypothetical protein | DNA helicase         |
| UK-EN32-U   | IS605   | 1      | Inverse          | hypothetical protein | DNA helicase         |
| Fr-GC43-G   | IS605   | 2      | Inverse          | DNA primase          | Exonuclease sbcC     |
|             |         |        | Direct           | holin                | hypothetical protein |
| Pt-B92-G    | IS605   | 1      | Direct           | DNA primase          | hypothetical protein |
| Fr-ANT170-U | ISHp608 | 2      | Inverse          | hypothetical protein | hypothetical protein |
|             |         |        | Direct           | hypothetical protein | hypothetical protein |
| Fr-MEG235-U | ISHp608 | 2      | Inverse          | hypothetical protein | hypothetical protein |
|             |         |        | Direct           | hypothetical protein | hypothetical protein |
| Pt-228_99-G | ISHp608 | 2      | Direct           | DNA helicase         | DNA primase          |
|             |         |        | Direct           | structural protein   | structural protein   |
| Pt-1293-U   | IS607   | 1      | Inverse          | structural protein   | Structural protein   |
| Fr-B58-M    | IS607   | 1      | Inverse          | Integrase            | DNA primase          |

\* Inverse or direct sense in relation to IS605 (accession number U60177), ISHp608 (accession number AF357224) and IS607 (accession number AB889602). Details on the location of IS sequences can be found in table S3.

**Table S6.** Sequences of tandem repeats at the 3' end of prophage genomes.

| Prophage genome | Repetition sequence at 3' end<br>Consensus pattern    | Size (bp) | Copy number |
|-----------------|-------------------------------------------------------|-----------|-------------|
| De-M53-M        | GGCGATGATAACGAAAGCGTGAGCGGTGTAGGTGTG                  | 36        | 3.1         |
|                 | GTGAAGCCCTATTACCACCATGCTGTAAAAAATTTT                  | 37        | 4.3         |
|                 | ATATTTTAAATTTATCTTAC                                  | 20        | 2.4         |
| Pt-1293-U       | GCGCCTTGCCGTGCTATAAA                                  | 20        | 7.5         |
| UK-EN31-U       | AGCCTCCTTATAATAGCGGAAGCGTGGGCGGTGGCTATGATGTGAGCGAGTGA | 53        | 4.9         |
| UK-EN32-U       | ATAGCGGAAGCGTGGGCGGTGGCTATGATGCGAGCGAGTGAAGCCTCCTTATA | 53        | 5.7         |
| Pt-B89-G        | AGCGGTGGCTATGGTAGCGA                                  | 20        | 16.4        |
| Pt-5771-G       | GCTATAAAGCGCCTTGCCGT                                  | 20        | 5.8         |
| Pt-5322-G       | GCGCCTTGCCTTGCTATAAA                                  | 20        | 10.9        |
| Is-3180-G       | AATAAACCGCCTTGCCATTC                                  | 20        | 4.9         |
|                 | AATGTGTGTTTTT                                         | 13        | 2.8         |
| Fr-ANT170-U     | AATGTTTTCA                                            | 10        | 6.8         |
|                 | TTTTCAAATGTTTTTAAACT                                  | 20        | 3.0         |
| Fr-MEG235-U     | AATGTTTTCA                                            | 10        | 6.8         |
|                 | TTTTCAAATGTTTTTAAACT                                  | 20        | 3.0         |
| Pt-1918-U       | AATTGTGACACA                                          | 12        | 2.1         |
